# Supplementary material for: Resting heart rate is an independent predictor of advanced colorectal adenoma recurrence
Source: PLOS journal article supplement (doi:10.1371/journal.pone.0193753), 2018-03-02
Supplement: S1 (10.1371/journal.pone.0193753.s001) [file journal.pone.0193753.s001]

S1 Table.

| Variables                                               | Quartile 1<br>45-66 b.p.m.<br>(n=79) | Quartile 2<br>67-73 b.p.m.<br>(n=76) | Quartile 3<br>74-80 b.p.m.<br>(n=70) | Quartile 4<br>81-120 b.p.m.<br>(n=75) | * <i>p</i> value |
|---------------------------------------------------------|--------------------------------------|--------------------------------------|--------------------------------------|---------------------------------------|------------------|
| <b>Number of follow-up colonoscopies</b>                |                                      |                                      |                                      |                                       | 0.414            |
| 1                                                       | 16 (20.3%)                           | 13 (17.1%)                           | 16 (22.9%)                           | 17 (22.7%)                            |                  |
| 2                                                       | 44 (55.7%)                           | 36 (47.4%)                           | 26 (37.1%)                           | 30 (40.0%)                            |                  |
| 3                                                       | 14 (17.7%)                           | 24 (31.6%)                           | 24 (34.3%)                           | 24 (32.0%)                            |                  |
| ≥4                                                      | 5 (6.3%)                             | 3 (3.9%)                             | 4 (5.7%)                             | 4 (5.3%)                              |                  |
| <b>Interval to first follow-up colonoscopy (months)</b> |                                      |                                      |                                      |                                       | 0.635            |
|                                                         | 16.9 ± 14.7                          | 15.6 ± 11.1                          | 18.7 ± 16.3                          | 17.6 ± 15.7                           |                  |

Variables are expressed as mean ± SD or n (%).

\**p* value for comparing quartile groups based on resting heart rate.

b.p.m., beat per minute; SD, standard deviation
