# Supplementary material for: Resting heart rate is an independent predictor of advanced colorectal adenoma recurrence
Source: PLOS journal article supplement (doi:10.1371/journal.pone.0193753), 2018-03-02
Supplement: S3 (10.1371/journal.pone.0193753.s003) [file journal.pone.0193753.s003]

S3 Table.

|                                   | Quartile 1<br>45-66 b.p.m.<br>(n=79) | Quartile 2<br>67-73 b.p.m.<br>(n=76) | Quartile 3<br>74-80 b.p.m.<br>(n=70) | Quartile 4<br>81-120 b.p.m.<br>(n=75) | <i>p</i> trend |
|-----------------------------------|--------------------------------------|--------------------------------------|--------------------------------------|---------------------------------------|----------------|
| <b>BMI</b>                        |                                      |                                      |                                      |                                       | 0.571          |
| Normal (BMI < 23) (n=94)          | 27 (34.2%)                           | 21 (27.6%)                           | 22 (31.4%)                           | 24 (32.0%)                            |                |
| Overweight (23 ≤ BMI < 25) (n=83) | 24 (30.4%)                           | 21 (27.6%)                           | 20 (28.6%)                           | 18 (24.0%)                            |                |
| Obese (BMI ≥ 25) (n=123)          | 28 (35.4%)                           | 34 (44.7%)                           | 28 (40.0%)                           | 33 (44.0%)                            |                |
| <b>Body fat mass</b>              |                                      |                                      |                                      |                                       | 0.041          |
| Lower than average (n=10)         | 5 (50.0%)                            | 3 (30.0%)                            | 1 (10.0%)                            | 1 (10.0%)                             |                |
| Average (n=104)                   | 30 (28.8%)                           | 29 (27.9%)                           | 20 (19.2%)                           | 25 (24.0%)                            |                |
| Higher than average (n=186)       | 44 (23.7%)                           | 44 (23.7%)                           | 49 (26.3%)                           | 49 (26.3%)                            |                |
| <b>Visceral fat area</b>          |                                      |                                      |                                      |                                       | 0.015          |
| Lower than average (n=36)         | 13 (36.1%)                           | 7 (19.4%)                            | 5 (13.9%)                            | 11 (30.6%)                            |                |
| Average (n=176)                   | 55 (31.3%)                           | 45 (25.6%)                           | 38 (21.6%)                           | 38 (21.6%)                            |                |
| Higher than average (n=88)        | 11 (12.5%)                           | 24 (27.3%)                           | 27 (30.7%)                           | 26 (29.5%)                            |                |

b.p.m., beat per minute; BMI, body mass index
